# Supplementary material for: Comparison of the Main Constituents in Two Varieties of Proso Millet Using GC–MS
Source: MDPI journal article supplement (doi:10.3390/foods12122294), 2023-06-07
Supplement: s1 [file s1]

**Table S1:** The limits of detection (LOD) and quantification (LOQ) for internal standard (Fluoranthene-D10)

| Variety     | Hanácká Mana |          |          |          | Unicum   |          |          |          |
|-------------|--------------|----------|----------|----------|----------|----------|----------|----------|
| Plant part  | roots        | stems    | leaves   | seeds    | roots    | stems    | leaves   | seeds    |
| S/N         | 401          | 297      | 211      | 653      | 306      | 339      | 241      | 405      |
| Area        | 20753371     | 25539484 | 30916506 | 28529223 | 22825276 | 30340553 | 28782286 | 22789320 |
| LOD [ng/ml] | 8.90         | 12.02    | 16.92    | 5.47     | 11.67    | 10.53    | 14.81    | 8.81     |
| LOQ [ng/ml] | 29.68        | 40.07    | 56.40    | 18.22    | 38.89    | 35.10    | 49.38    | 29.38    |

c(IS) = 1.19 ug/ml of extract

**Table S2:** Components identified in proso millet

| RT (min) | Compound                                                                  | Molecular Formula                                                             | MW     | MF    |
|----------|---------------------------------------------------------------------------|-------------------------------------------------------------------------------|--------|-------|
| 4.15     | Alanin-2TMS                                                               | C <sub>9</sub> H <sub>23</sub> NO <sub>2</sub> Si <sub>2</sub>                | 233.46 | 919   |
| 4.64     | Valin-2TMS                                                                | C <sub>11</sub> H <sub>27</sub> NO <sub>2</sub> Si <sub>2</sub>               | 261.51 | 916   |
| 4.82     | Glycerol-3TMS                                                             | C <sub>12</sub> H <sub>32</sub> O <sub>3</sub> Si <sub>3</sub>                | 308.64 | 897   |
| 4.84     | Phosphoric acid-3TMS                                                      | C <sub>15</sub> H <sub>41</sub> O <sub>6</sub> PSi <sub>4</sub>               | 460.80 | 909   |
| 4.94     | Isoleucin-2TMS                                                            | C <sub>12</sub> H <sub>29</sub> NO <sub>2</sub> Si <sub>2</sub>               | 275.54 | 871   |
| 4.99     | Proline-2TMS                                                              | C <sub>11</sub> H <sub>25</sub> NO <sub>2</sub> Si <sub>2</sub>               | 259.50 | 772   |
| 5.01     | Succinic acid-2TMS                                                        | C <sub>10</sub> H <sub>22</sub> O <sub>4</sub> Si <sub>2</sub>                | 266.00 | 873   |
| 5.15     | Fumaric acid-2TMS                                                         | C <sub>10</sub> H <sub>20</sub> O <sub>4</sub> Si <sub>2</sub>                | 260.44 | 894   |
| 5.18     | Serin-3TMS                                                                | C <sub>12</sub> H <sub>31</sub> NO <sub>3</sub> Si <sub>3</sub>               | 321.64 | 920   |
| 5.3      | Threonin-3TMS                                                             | C <sub>13</sub> H <sub>33</sub> NO <sub>3</sub> Si <sub>3</sub>               | 335.66 | 890   |
| 5.73     | Malic acid-3TMS                                                           | C <sub>13</sub> H <sub>30</sub> O <sub>5</sub> Si <sub>3</sub>                | 350.63 | 931   |
| 5.82     | mezo-Erythritol-4TMS                                                      | C <sub>16</sub> H <sub>42</sub> O <sub>4</sub> Si <sub>4</sub>                | 410.85 | 919   |
| 5.98     | Pyroglutamic acid-2TMS                                                    | C <sub>11</sub> H <sub>23</sub> NO <sub>3</sub> Si <sub>2</sub>               | 273.48 | 896   |
| 6.07     | Threonic acid-4TMS                                                        | C <sub>16</sub> H <sub>40</sub> O <sub>5</sub> Si <sub>4</sub>                | 424.83 | 862   |
| 6.47     | Rhamnopyranose-4TMS                                                       | C <sub>18</sub> H <sub>44</sub> O <sub>5</sub> Si <sub>4</sub>                | 452.88 | 910   |
| 6.57     | Phenylalanine-2TMS                                                        | C <sub>15</sub> H <sub>27</sub> NO <sub>2</sub> Si <sub>2</sub>               | 309.55 | 884   |
| 6.68     | Lauric acid-TMS (Dodecanoic)                                              | C <sub>15</sub> H <sub>32</sub> O <sub>2</sub> Si                             | 272.50 | 880   |
| 6.93     | Fucose/Fucopyranose-4TMS                                                  | C <sub>18</sub> H <sub>44</sub> O <sub>5</sub> Si <sub>4</sub>                | 452.88 | 885   |
| 7.05     | Arabitol-5TMS                                                             | C <sub>20</sub> H <sub>52</sub> O <sub>5</sub> Si <sub>5</sub>                | 513.05 | 924   |
| 7.09     | Pentahydroxycyclohexanone-5TMS                                            | C <sub>21</sub> H <sub>50</sub> O <sub>6</sub> Si <sub>5</sub>                | 539.04 | 707   |
| 7.32     | Phosphoric acid, 2,3-bis(trimethylsiloxy)propyl bis(trimethylsilyl) ester | C <sub>15</sub> H <sub>41</sub> O <sub>6</sub> PSi <sub>4</sub>               | 460.80 | 820   |
| 7.47     | Glutamine-3TMS                                                            | C <sub>14</sub> H <sub>34</sub> N <sub>2</sub> O <sub>3</sub> Si <sub>3</sub> | 362.69 | 868   |
| 7.69     | Fructofuranose-5TMS                                                       | C <sub>21</sub> H <sub>52</sub> O <sub>6</sub> Si <sub>5</sub>                | 541.06 | 923   |
| 7.74     | Psicofuranose- 5TMS                                                       | C <sub>21</sub> H <sub>52</sub> O <sub>6</sub> Si <sub>5</sub>                | 541.06 | 900   |
| 7.87     | Fructopyranose-5TMS                                                       | C <sub>21</sub> H <sub>52</sub> O <sub>6</sub> Si <sub>5</sub>                | 541.06 | 890   |
| 7.98     | Glucufuranose-5TMS                                                        | C <sub>6</sub> H <sub>12</sub> O <sub>6</sub> Si <sub>5</sub>                 | 320.58 | < 700 |
| 8.15     | Tetradecanoic acid-TMS                                                    | C <sub>17</sub> H <sub>36</sub> O <sub>2</sub> Si                             | 300.60 | 832   |

|       |                                               |                                                                 |        |       |
|-------|-----------------------------------------------|-----------------------------------------------------------------|--------|-------|
| 8.44  | Psicose-5TMS                                  | C <sub>21</sub> H <sub>52</sub> O <sub>6</sub> Si <sub>5</sub>  | 541.06 | 875   |
| 8.49  | Talose-5TMS                                   | C <sub>21</sub> H <sub>52</sub> O <sub>6</sub> Si <sub>5</sub>  | 541.10 | 904   |
| 8.87  | Sorbitol-6TMS                                 | C <sub>24</sub> H <sub>62</sub> O <sub>6</sub> Si <sub>6</sub>  | 615.26 | 907   |
| 8.94  | Glucose-5TMS                                  | C <sub>21</sub> H <sub>52</sub> O <sub>6</sub> Si <sub>5</sub>  | 541.06 |       |
| 9.04  | Cinnamic acid-2TMS                            | C <sub>15</sub> H <sub>24</sub> O <sub>3</sub> Si <sub>2</sub>  | 308.52 | 864   |
| 9.28  | Talose/Talopyranose-5TMS                      | C <sub>21</sub> H <sub>52</sub> O <sub>6</sub> Si <sub>5</sub>  | 541.06 | 913   |
| 10.15 | Palmitic acid-TMS                             | C <sub>19</sub> H <sub>40</sub> O <sub>2</sub> Si               | 328.61 | 893   |
| 11.71 | Tetramethyl-2-hexadecene-1-ol-TMS             | C <sub>23</sub> H <sub>48</sub> OSi                             | 368.71 | 928   |
| 12.20 | Linoleic acid-TMS                             | C <sub>21</sub> H <sub>38</sub> O <sub>2</sub> Si               | 350.61 | 889   |
| 12.27 | Octadecenoic acid                             | C <sub>18</sub> H <sub>34</sub> O <sub>2</sub>                  | 282.50 | 796   |
| 12.61 | Stearic acid-TMS                              | C <sub>21</sub> H <sub>44</sub> O <sub>2</sub> Si               | 356.66 | 923   |
| 14.00 | Retinal                                       | C <sub>20</sub> H <sub>28</sub> O                               | 284.44 | 729   |
| 15.30 | Eicosanoic acid-TMS                           | C <sub>23</sub> H <sub>48</sub> O <sub>2</sub> Si               | 384.71 | 852   |
| 16.43 | Sucrose-8TMS                                  | C <sub>36</sub> H <sub>86</sub> O <sub>11</sub> Si <sub>8</sub> | 919.75 | 882   |
| 17.37 | Sucrose-8TMS                                  | C <sub>36</sub> H <sub>86</sub> O <sub>11</sub> Si <sub>8</sub> | 919.75 | 856   |
| 18.08 | Sucrose-8TMS                                  | C <sub>36</sub> H <sub>86</sub> O <sub>11</sub> Si <sub>8</sub> | 919.75 | 930   |
| 19.13 | Turanose-8TMS                                 | C <sub>36</sub> H <sub>86</sub> O <sub>11</sub> Si <sub>8</sub> | 919.75 | 801   |
| 19.24 | Cellobiose-8TMS                               | C <sub>36</sub> H <sub>86</sub> O <sub>11</sub> Si <sub>8</sub> | 919.75 | < 700 |
| 19.52 | Trehalose-8TMS                                | C <sub>36</sub> H <sub>86</sub> O <sub>11</sub> Si <sub>8</sub> | 919.75 | 913   |
| 19.62 | Linoleic acid, 1,3-bis-(O-TMS)-2-propyl ester | C <sub>27</sub> H <sub>54</sub> O <sub>4</sub> Si <sub>2</sub>  | 498.9  | 719   |
| 19.66 | Aucubin-6TMS                                  | C <sub>33</sub> H <sub>70</sub> O <sub>9</sub> Si <sub>6</sub>  | 779.41 | 758   |
| 20.51 | Squalene                                      | C <sub>30</sub> H <sub>50</sub>                                 | 410.72 | 795   |
| 20.77 | Tetracosanoic acid-TMS                        | C <sub>27</sub> H <sub>56</sub> O <sub>2</sub> Si               | 440.80 | 828   |
| 22.57 | 1-Glycerol mono-eicosanoate-2TMS              | C <sub>29</sub> H <sub>62</sub> O <sub>4</sub> Si <sub>2</sub>  | 530.97 | 682   |
| 22.84 | Tocopherol-TMS                                | C <sub>32</sub> H <sub>58</sub> O <sub>2</sub> Si               | 502.90 | 893   |
| 23.40 | Hexacosanoic acid-TMS                         | C <sub>29</sub> H <sub>60</sub> O <sub>2</sub> Si               | 468.90 | 823   |
| 24.96 | Tocopherol-TMS                                | C <sub>32</sub> H <sub>58</sub> O <sub>2</sub> Si               | 502.89 | 912   |
| 25.06 | Cholesterol-TMS                               | C <sub>30</sub> H <sub>54</sub> OSi                             | 458.84 | 897   |
| 26.94 | Campesterol-TMS                               | C <sub>31</sub> H <sub>56</sub> OSi                             | 472.86 | 870   |
| 27.31 | Miliacin                                      | C <sub>31</sub> H <sub>52</sub> O                               | 440.70 | 811   |
| 27.47 | Stigmasterol-TMS                              | C <sub>32</sub> H <sub>56</sub> OSi                             | 484.87 | 918   |
| 28.79 | β-Sitosterol-TMS                              | C <sub>32</sub> H <sub>58</sub> OSi                             | 486.89 | 901   |
| 29.07 | Triaccontoxy-TMS                              | C <sub>33</sub> H <sub>70</sub> OSi                             | 510.99 | 746   |
| 29.32 | Amyrin_TMS                                    | C <sub>33</sub> H <sub>58</sub> OSi                             | 498.90 | 860   |
| 29.53 | Germanicol-TMS                                | C <sub>33</sub> H <sub>58</sub> OSi                             | 498.90 | 762   |
| 31.50 | probably Triaccontanoic acid-TMS              | C <sub>33</sub> H <sub>68</sub> O <sub>2</sub> Si               | 524.98 | < 700 |
| 35.12 | Dotriacontyloxy-TMS                           | C <sub>35</sub> H <sub>74</sub> OSi                             | 539.04 | 746   |

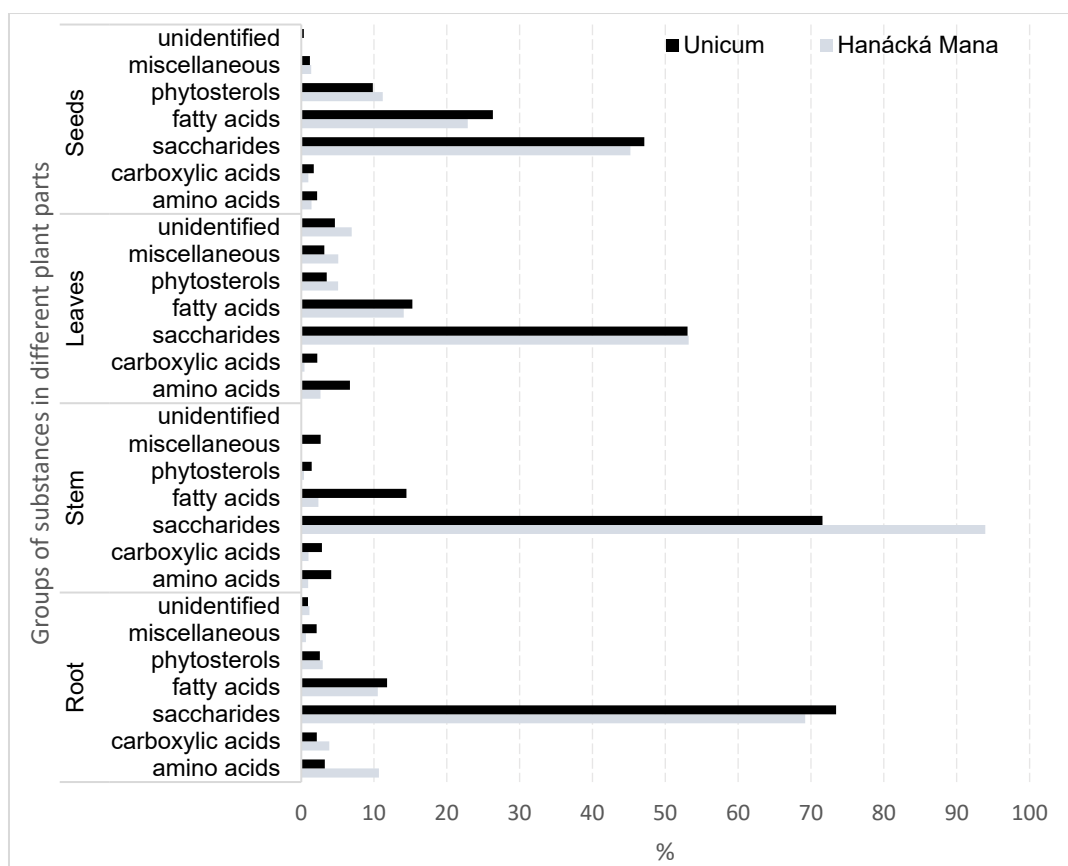

**Figure S1.** Comparison of the relative representation of the sums of the peak areas of the identified main groups of substances to the total area of all peaks (%) in Hanácká Mana and Unicum varieties of proso millet.

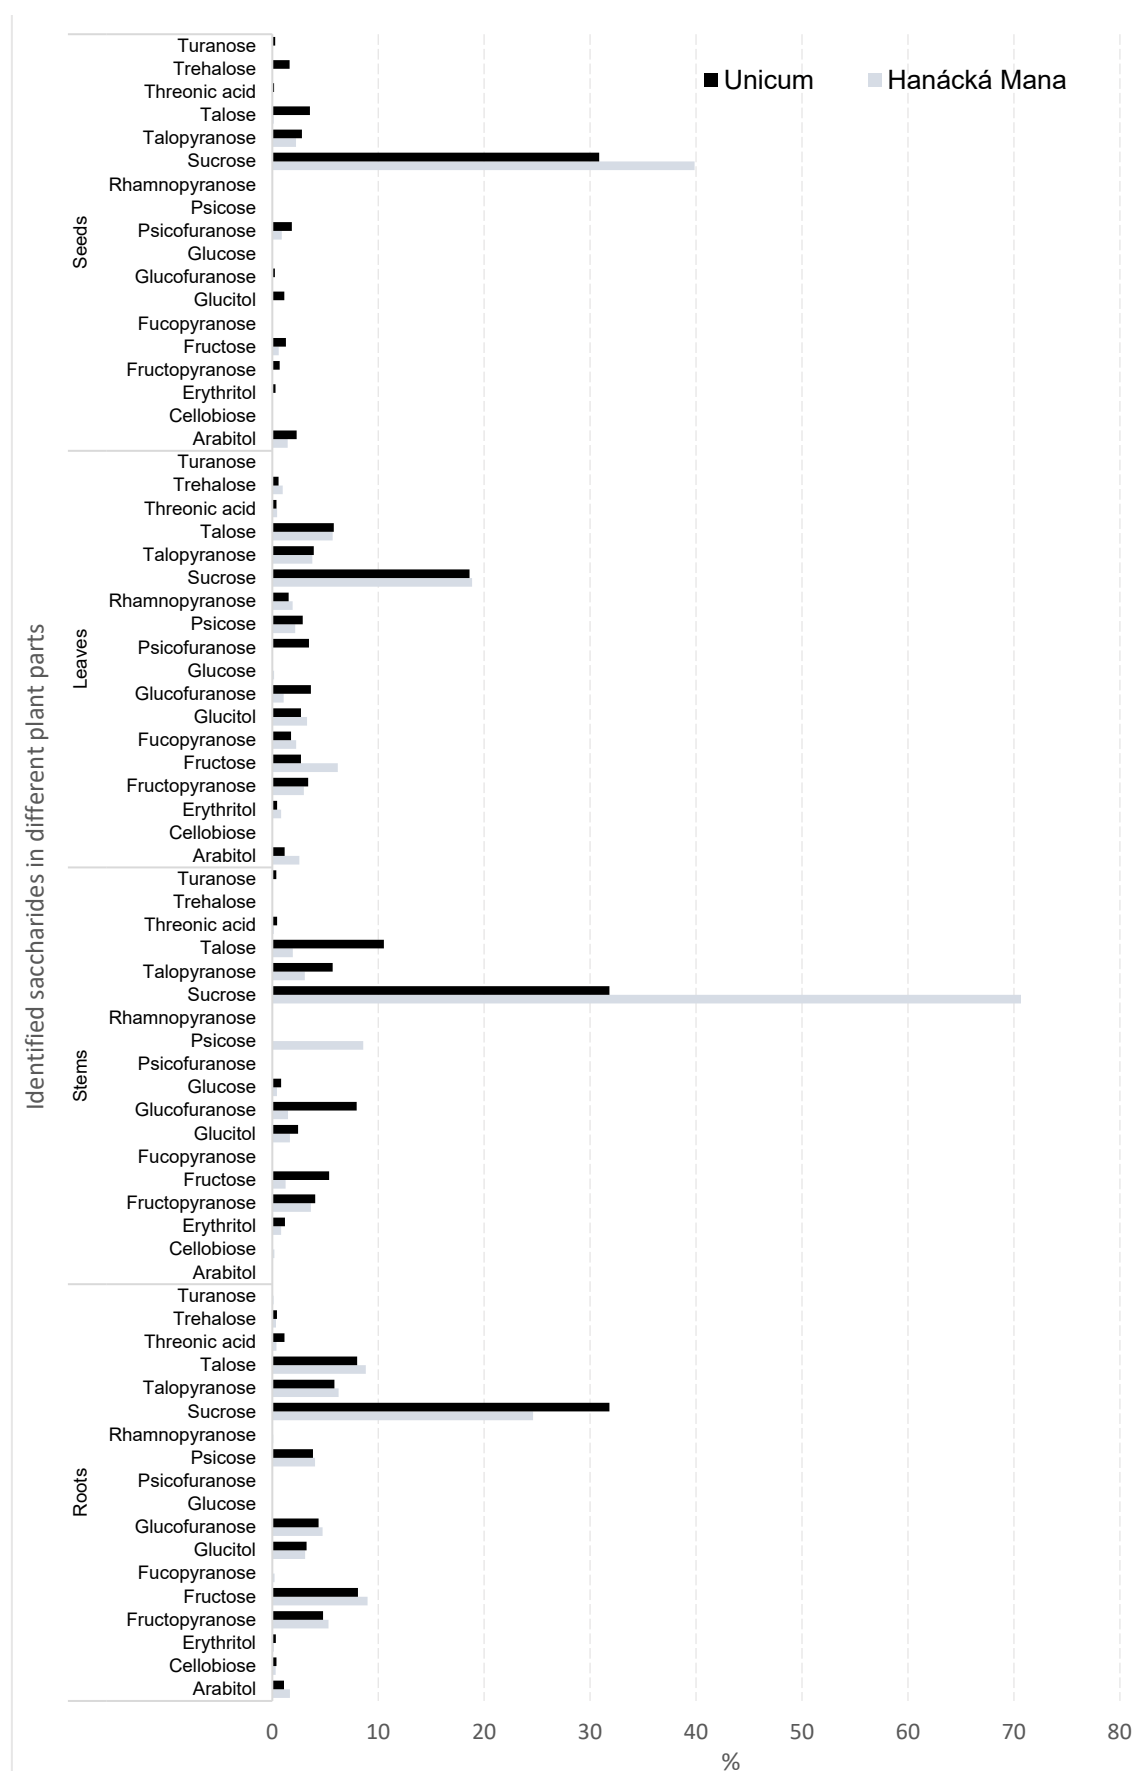

**Figure S2.** Comparison of the relative representation of the areas of individual peaks of the identified saccharides to the total area of all peaks (%) in Hanácká Mana and Unicum varieties of proso millet.

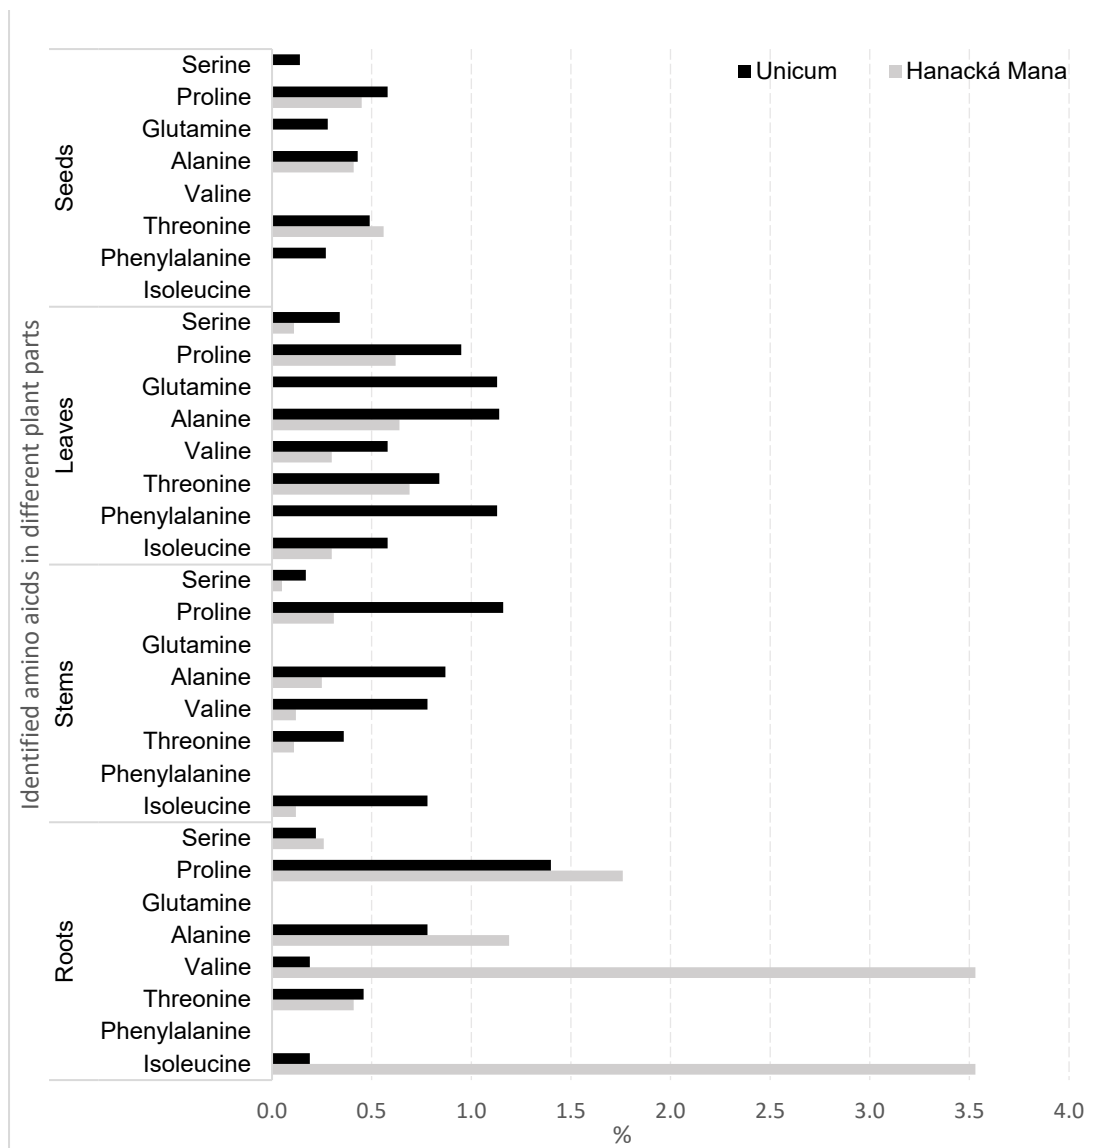

**Figure S3.** Comparison of the relative representation of the areas of individual peaks of identified amino acids to the total area of all peaks (%) in varieties Hanacká Mana and Unicum of proso millet.

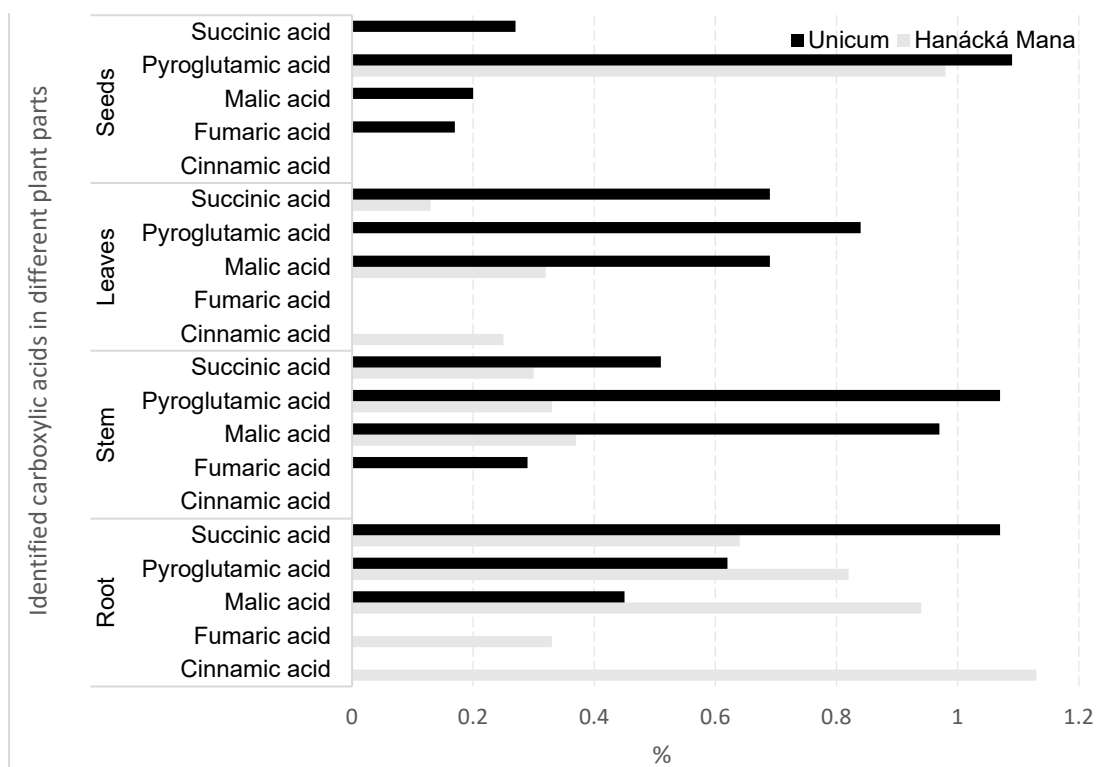

**Figure S4.** Comparison of the relative representation of the areas of individual peaks of identified carboxylic acids to the total area of all peaks (%) in varieties Hanácká Mana and Unicum of proso millet.

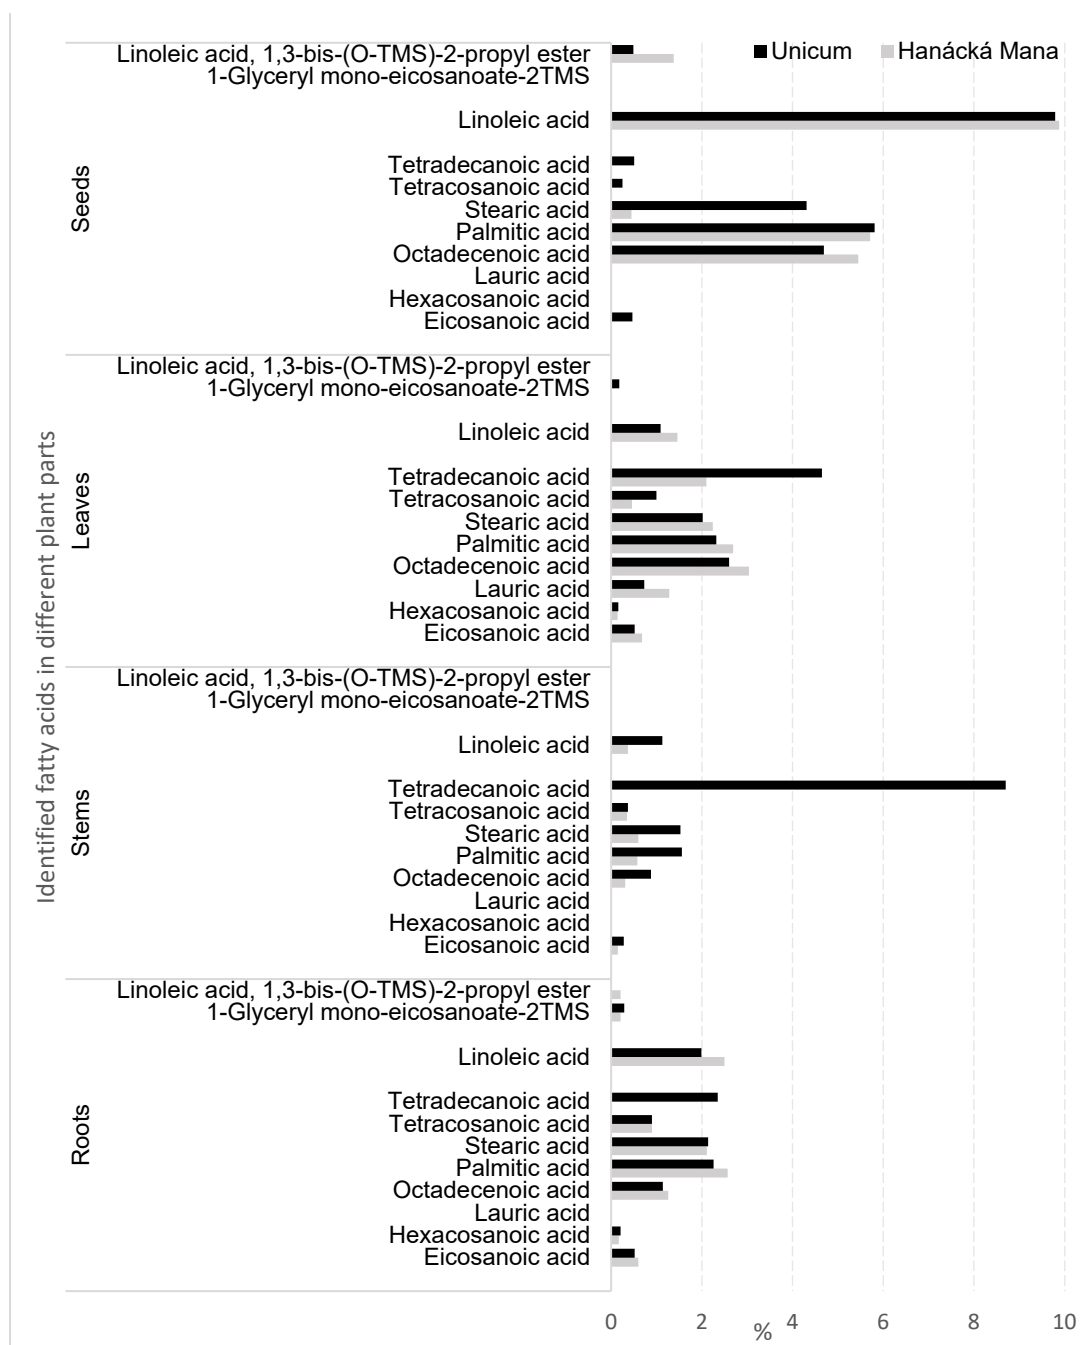

**Figure S5.** Comparison of the relative representation of the areas of individual peaks of identified fatty acids to the total area of all peaks (%) in varieties Hanácká Mana and Unicum of proso millet.

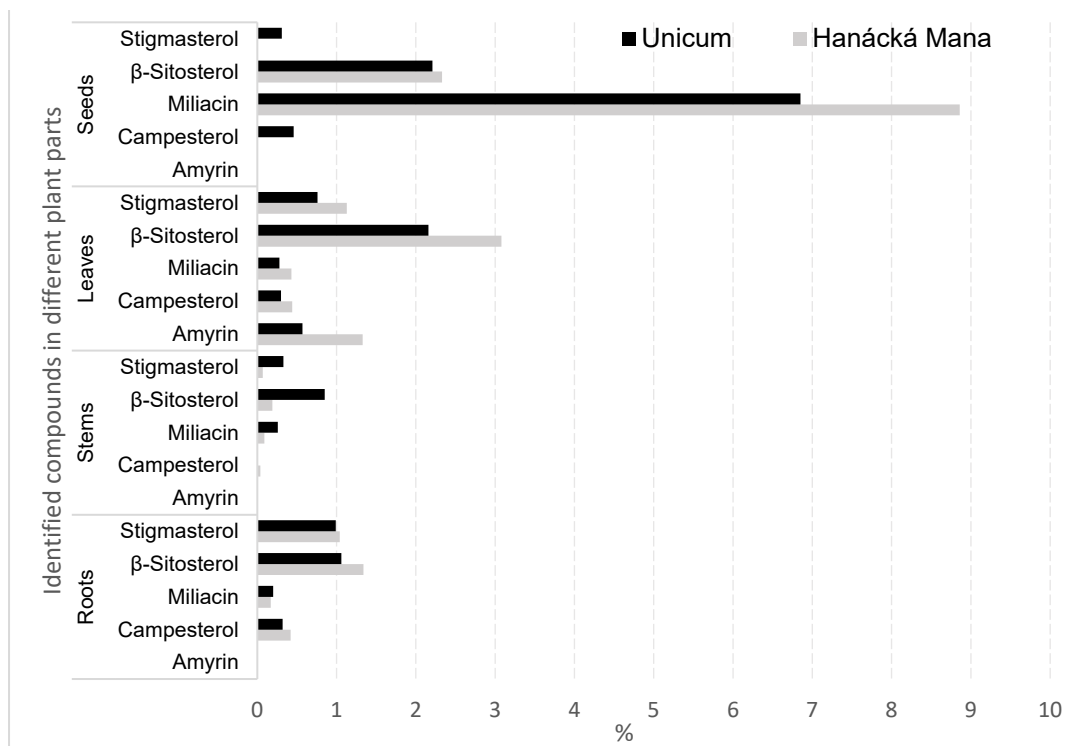

**Figure S6.** Comparison of the relative representation of the areas of individual peaks of identified phytosterols, amyirin and miliacin to the total area of all peaks (%) in varieties Hanácká Mana and Unicum of proso millet.

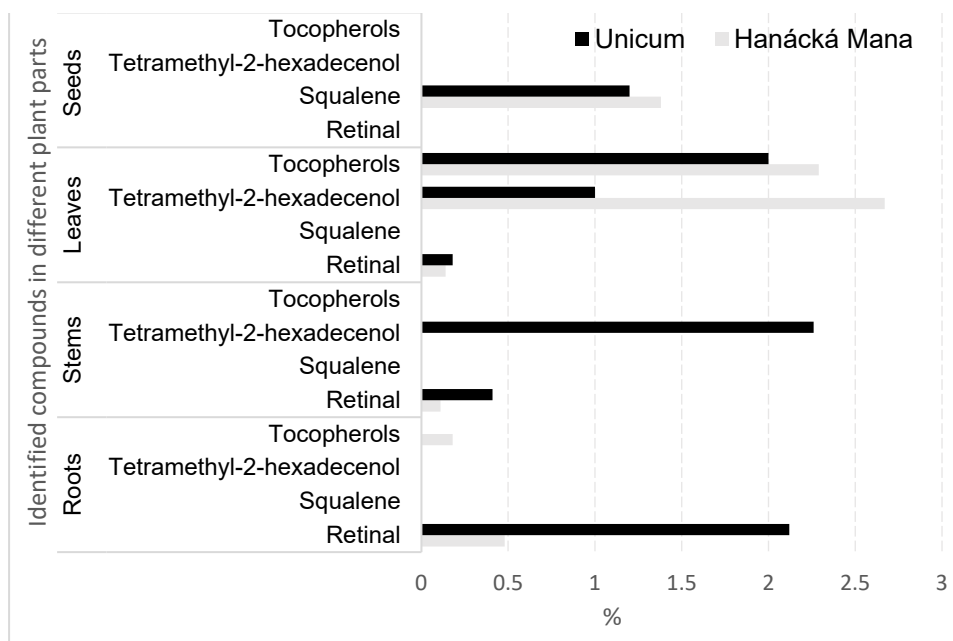

**Figure S7.** Comparison of the relative representation of the areas of individual peaks of identified miscellaneous compounds to the total area of all peaks (%) in varieties Hanácká Mana and Unicum of proso millet.
